# Supplementary material for: Unsymmetrical α-diiminonickel bromide complexes: synthesis, characterization and their catalytic behavior toward ethylene
Source: Royal Society of Chemistry journal article supplement (doi:10.1039/c3cy00422h), 2013-01-01
Supplement: c3cy00422h.pdf [file c3cy00422h.pdf]

**Unsymmetrical  $\alpha$ -diiminonickel bromide complexes: Synthesis, characterization and investigation of their catalytic behavior toward ethylene**

Dedong Jia, Wenjuan Zhang, Weiliang Liu, Lin Wang, Carl Redshaw, and Wen-Hua Sun

**Table S** Crystal data and structure refinement for **Ni4** and **Ni5**

|                                                  | <b>Ni4</b>                                                          | <b>Ni5</b>                                                          |
|--------------------------------------------------|---------------------------------------------------------------------|---------------------------------------------------------------------|
| Empirical formula                                | C <sub>45</sub> H <sub>41</sub> Br <sub>2</sub> ClN <sub>2</sub> Ni | C <sub>47</sub> H <sub>45</sub> Br <sub>2</sub> ClN <sub>2</sub> Ni |
| fw                                               | 863.78                                                              | 891.83                                                              |
| T/K                                              | 173(2)                                                              | 173(2)                                                              |
| $\lambda/\text{Å}$                               | 0.71073                                                             | 0.71073                                                             |
| Cryst. syst.                                     | Monoclinic                                                          | Monoclinic                                                          |
| Space group                                      | P2(1)/c                                                             | P2(1)/c                                                             |
| a/Å                                              | 9.6013(19)                                                          | 9.922(2)                                                            |
| b/Å                                              | 16.927(3)                                                           | 16.840(3)                                                           |
| c/Å                                              | 24.799(5)                                                           | 24.975(5)                                                           |
| $\alpha$ (o)                                     | 90                                                                  | 90                                                                  |
| $\beta$ (o)                                      | 100.77(3)                                                           | 98.41(3)                                                            |
| $\gamma$ (o)                                     | 90                                                                  | 90                                                                  |
| V (Å <sup>3</sup> )                              | 3959.4(14)                                                          | 4128.3(14)                                                          |
| Z                                                | 4                                                                   | 4                                                                   |
| Dcalcd. (gcm <sup>-3</sup> )                     | 1.449                                                               | 1.435                                                               |
| $\mu/\text{mm}^{-1}$                             | 2.610                                                               | 2.505                                                               |
| F(000)                                           | 1760                                                                | 1824                                                                |
| Cryst. size / mm                                 | 0.54×0.22×0.19                                                      | 0.20×0.13×0.08                                                      |
| $\theta$ range (o)                               | 2.41 - 27.48                                                        | 1.46 - 27.46                                                        |
| Limiting indices                                 | -12 ≤ h ≤ 10<br>-21 ≤ k ≤ 21<br>-32 ≤ l ≤ 29                        | -12 ≤ h ≤ 11<br>-20 ≤ k ≤ 21<br>-32 ≤ l ≤ 29                        |
| No. of rflns collected                           | 26497                                                               | 27562                                                               |
| No. unique rflns [R(int)]                        | 9040 (0.0594)                                                       | 9393(0.0702)                                                        |
| Completeness to $\theta$ (%)                     | 99.4%                                                               | 99.4 %                                                              |
| Abs corr                                         | none                                                                | none                                                                |
| Data / restraints / params                       | 9040 / 0 / 460                                                      | 9393 / 0 / 478                                                      |
| Goodness of fit on F <sup>2</sup>                | 1.079                                                               | 1.193                                                               |
| Final R indices [I > 2 $\sigma$ (I)]             | R1 = 0.0668<br>wR2 = 0.1943                                         | R1 = 0.0979<br>wR2 = 0.2363                                         |
| R indices (all data)                             | R1 = 0.0818<br>wR2 = 0.2163                                         | R1 = 0.1333<br>wR2 = 0.2722                                         |
| Largest diff. peak and hole (e Å <sup>-3</sup> ) | 0.612 and -0.574                                                    | 1.364 and -0.989                                                    |
